# Supplementary material
Source: HighWire-hosted journal article supplement (http://www.qdcxjkg.com/highwire/filestream/113668/field_highwire_adjunct_files/0/ONLINE_FigureE1_CONTROL.pdf)

Figure E1

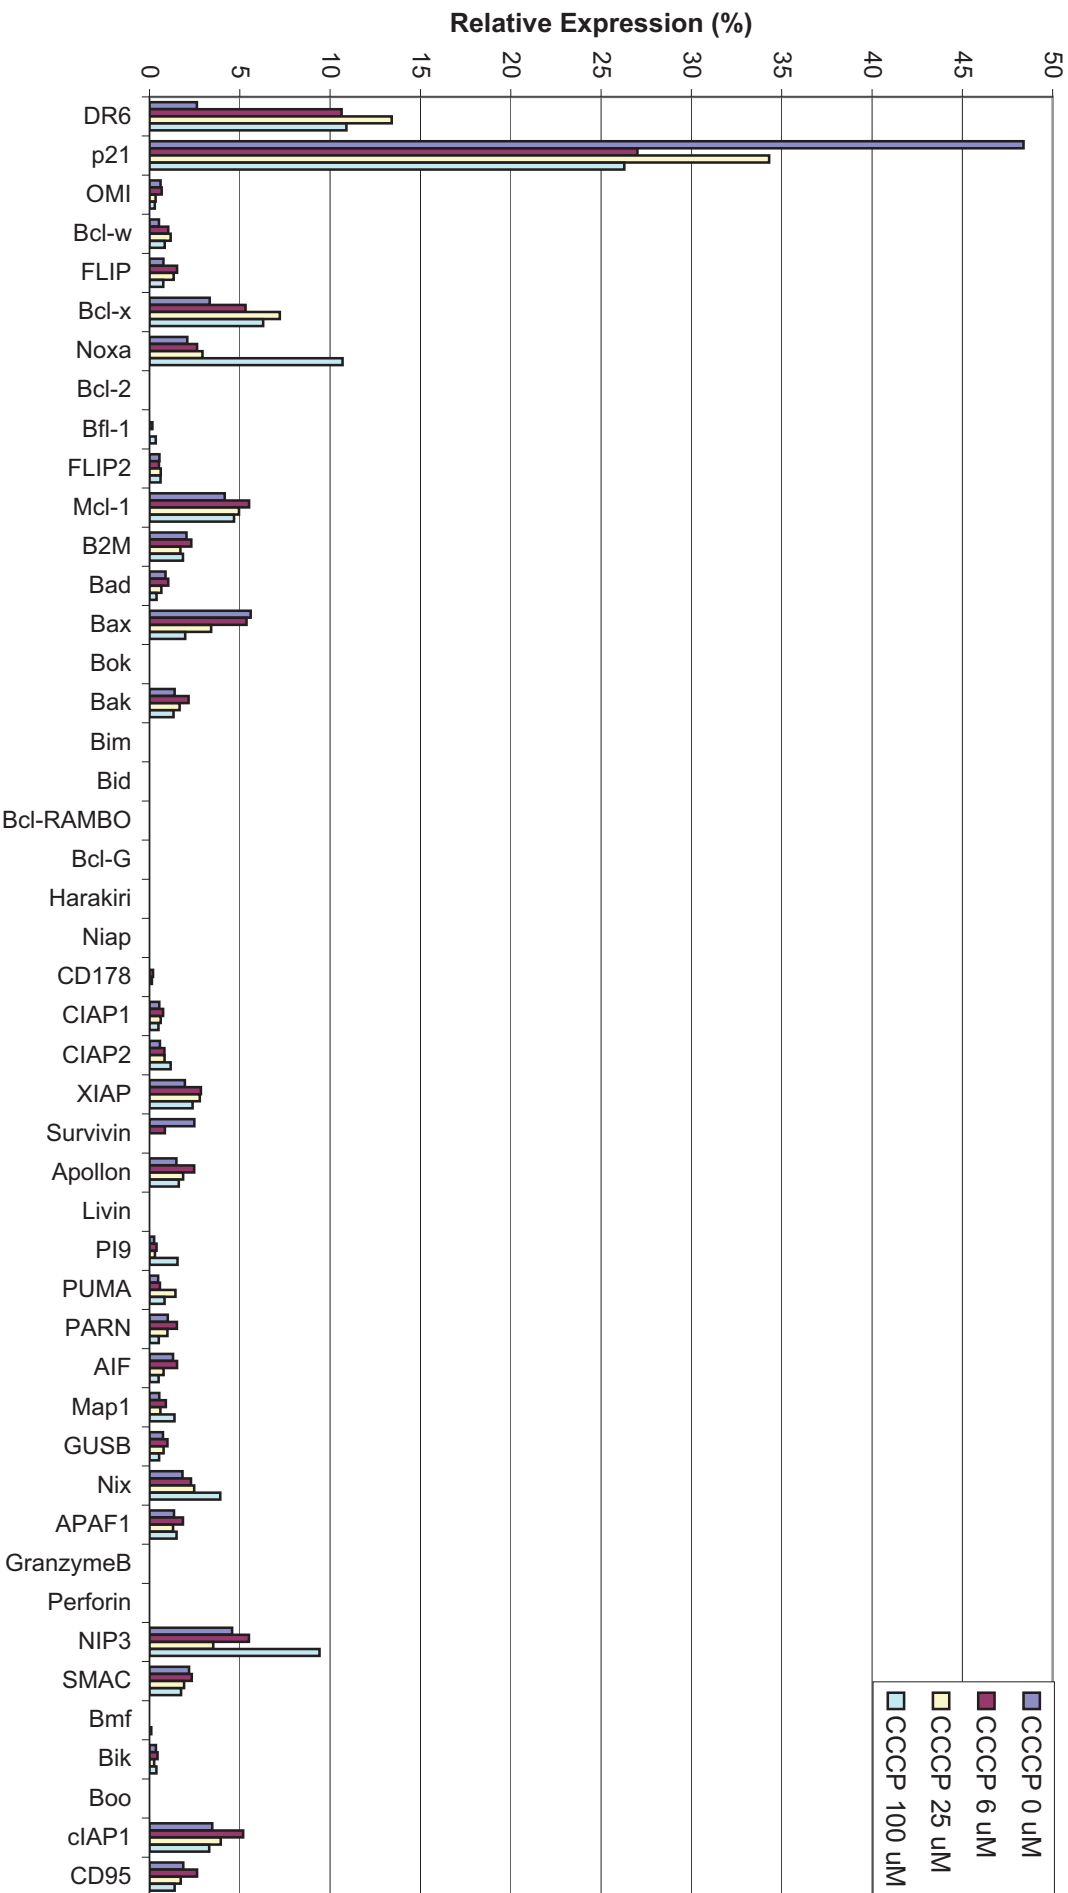

Supplement: ONLINE_FigureE1_CONTROL.pdf [file ONLINE_FigureE1_CONTROL.pdf]
